# Supplementary material for: Portuguese version of the Expanded Prostate Cancer Index Composite for Clinical Practice (EPIC-CP): psychometric validation and prospective application for early functional outcomes at a single institution
Source: Springer Nature journal article supplement (doi:10.1186/s12894-020-00734-y), 2020-10-20
Supplement: MOESM1 [file 18504184]

# Índice Composto Expandido de Câncer de Próstata para Prática Clínica (EPIC-PC)

"Expanded Prostate Cancer Index Composite for Clinical Practice (EPIC-CP)"

Data \_\_\_/\_\_\_/\_\_\_

## Instrumento clínico para medir questões relativas à Qualidade de Vida em pacientes com câncer de próstata.

**Paciente:** Favor responder as questões abaixo, sinalizando a opção mais apropriada. Todas as questões devem ser respondidas baseadas nos sintomas das **ÚLTIMAS QUATRO SEMANAS**. Selecionar apenas uma opção para cada pergunta.

### 1. No geral, você está tendo problemas para urinar?

- Não                       Muito pouco                       Pouco                       Moderadamente                       Muito

### 2. Qual das opções a seguir descreve melhor o seu controle urinário?

- 0  Controle total    1  Gotejamento ocasional    2  Gotejamento frequente    4  Nenhum controle    \_\_\_\_\_

### 3. Quantos absorventes ou fraldas para adultos você normalmente tem usado devido a perda urinária?

- 0  Nenhum    1  Um por dia                      2  Dois por dia                      4  Três ou mais por dia    \_\_\_\_\_

### 4. O gotejamento ou escape urinário está sendo problemático (incômodo) para você?

- 0  Nada                      1  Muito pouco                      2  Pouco                      3  Moderado                      4  Muito    \_\_\_\_\_

\*O MÉDICO deverá somar as respostas das questões de 2-4 para calcular o **Escore de Sintomas de Incontinência Urinária (máximo 12)**: \_\_\_\_\_

### 5. Quão problemático (incômodo) têm sido cada um dos itens descritos abaixo?

|                                                                   | Nada                       | Muito Pouco                | Pouco                      | Moderadamente              | Muito                      |
|-------------------------------------------------------------------|----------------------------|----------------------------|----------------------------|----------------------------|----------------------------|
| a. Doeu ou ardeu para urinar _____                                | 0 <input type="checkbox"/> | 1 <input type="checkbox"/> | 2 <input type="checkbox"/> | 3 <input type="checkbox"/> | 4 <input type="checkbox"/> |
| b. Jato de urina fraco ou esvaziamento incompleto da bexiga _____ | 0 <input type="checkbox"/> | 1 <input type="checkbox"/> | 2 <input type="checkbox"/> | 3 <input type="checkbox"/> | 4 <input type="checkbox"/> |
| c. Necessidade frequente de urinar durante o dia _____            | 0 <input type="checkbox"/> | 1 <input type="checkbox"/> | 2 <input type="checkbox"/> | 3 <input type="checkbox"/> | 4 <input type="checkbox"/> |

\*O MÉDICO deverá somar as respostas das questões de 5a-5c para calcular o **Escore de Sintomas Urinários Irritativos/Obstrutivos (máximo 12)**: \_\_\_\_\_

### 6. Quão problemático (incômodo) têm sido cada um dos itens descritos abaixo?

|                                                 | Nada                       | Muito Pouco                | Pouco                      | Moderadamente              | Muito                      |
|-------------------------------------------------|----------------------------|----------------------------|----------------------------|----------------------------|----------------------------|
| a. Dor retal ou urgência para evacuar _____     | 0 <input type="checkbox"/> | 1 <input type="checkbox"/> | 2 <input type="checkbox"/> | 3 <input type="checkbox"/> | 4 <input type="checkbox"/> |
| b. Aumento da frequência das evacuações _____   | 0 <input type="checkbox"/> | 1 <input type="checkbox"/> | 2 <input type="checkbox"/> | 3 <input type="checkbox"/> | 4 <input type="checkbox"/> |
| c. Problemas com seus hábitos intestinais _____ | 0 <input type="checkbox"/> | 1 <input type="checkbox"/> | 2 <input type="checkbox"/> | 3 <input type="checkbox"/> | 4 <input type="checkbox"/> |

\*O MÉDICO deverá somar as respostas das questões de 6a-6c para calcular o **Escore de Sintomas Intestinais (máximo 12)**: \_\_\_\_\_

### 7. Como você classificaria a sua capacidade de ter um orgasmo (clímax)?

- 0  Muito bom                      1  Bom                      2  Razoável                      3  Deficiente                      4  Muito deficiente a nula    \_\_\_\_\_

### 8. Como você descreveria a QUALIDADE habitual de suas ereções?

- 0  Firme suficiente para relação sexual                      1  Firme suficiente para masturbação e preliminares                      2  Não o suficientemente firme para qualquer atividade sexual                      4  Absolutamente nenhuma    \_\_\_\_\_

### 9. Como um todo, quão problemática (incômoda) têm sido sua função sexual ou sua falta de função sexual?

- 0  Nada problemática                      1  Muito pouco problemática                      2  Pouco problemática                      3  Moderadamente Problemática                      4  Muito problemática    \_\_\_\_\_

\*O MÉDICO deverá somar as respostas das questões de 7-9 para calcular o **Escore de Sintomas Sexuais (máximo 12)**: \_\_\_\_\_

### 10. Quão problemática (incômoda) foram para você cada uma das seguintes situações descritas abaixo?

|                                                          | Nada                       | Muito pouco                | Pouco                      | Moderadamente              | Muito                      |
|----------------------------------------------------------|----------------------------|----------------------------|----------------------------|----------------------------|----------------------------|
| a. Ondas de calor ou sensibilidade mamária/aumento _____ | 0 <input type="checkbox"/> | 1 <input type="checkbox"/> | 2 <input type="checkbox"/> | 3 <input type="checkbox"/> | 4 <input type="checkbox"/> |
| b. Sentindo-se deprimido/triste _____                    | 0 <input type="checkbox"/> | 1 <input type="checkbox"/> | 2 <input type="checkbox"/> | 3 <input type="checkbox"/> | 4 <input type="checkbox"/> |
| c. Falta de energia/desanimado _____                     | 0 <input type="checkbox"/> | 1 <input type="checkbox"/> | 2 <input type="checkbox"/> | 3 <input type="checkbox"/> | 4 <input type="checkbox"/> |

\*O MÉDICO deverá somar as respostas das questões de 10a-10c para calcular o **Escore de Sintomas de Vitalidade/Hormonal(máximo 12)**: \_\_\_\_\_

**O MÉDICO** deverá somar os escores dos cinco domínios para calcular o **Escore Geral de Qualidade de Vida (máximo 60)**: \_\_\_\_\_
