# Supplementary material for: Portuguese version of the Expanded Prostate Cancer Index Composite for Clinical Practice (EPIC-CP): psychometric validation and prospective application for early functional outcomes at a single institution
Source: Springer Nature journal article supplement (doi:10.1186/s12894-020-00734-y), 2020-10-20
Supplement: MOESM2 [file 18504184]

# Expanded Prostate Cancer Index Composite for Clinical Practice (EPIC-CP)

A Clinical Tool to Measure Urinary, Bowel, Sexual and Vitality/Hormonal Health

Date: \_\_\_/\_\_\_/\_\_\_

**Patients:** Please answer the following questions by checking the appropriate checkbox. All questions are about your health and symptoms in the **LAST FOUR WEEKS**. Select one answer for each question.

1. Overall, how much of a problem has your urinary function been for you?

- No problem     Very small problem     Small problem     Moderate problem     Big problem

2. Which of the following best describes your urinary control?

- 0  Total control    1  Occasional dribbling    2  Frequent dribbling    4  No urinary control    \_\_\_\_\_

3. How many pads or adult diapers per day have you been using for urinary leakage?

- 0  None    1  One pad per day    2  Two pads per day    4  Three or more pads per day    \_\_\_\_\_

4. How big a problem, if any, has urinary dripping or leakage been for you?

- 0  No problem    1  Very small problem    2  Small problem    3  Moderate problem    4  Big problem    \_\_\_\_\_

CLINICIANS: ADD the answers from questions 2-4 to calculate the **Urinary Incontinence Symptom Score (out of 12):**

5. How big a problem, if any, has each of the following been for you?

|                                                        | No problem                 | Very small problem         | Small problem              | Moderate problem           | Big problem                |       |
|--------------------------------------------------------|----------------------------|----------------------------|----------------------------|----------------------------|----------------------------|-------|
| a. Pain or burning with urination _____                | 0 <input type="checkbox"/> | 1 <input type="checkbox"/> | 2 <input type="checkbox"/> | 3 <input type="checkbox"/> | 4 <input type="checkbox"/> | _____ |
| b. Weak urine stream/incomplete bladder emptying _____ | 0 <input type="checkbox"/> | 1 <input type="checkbox"/> | 2 <input type="checkbox"/> | 3 <input type="checkbox"/> | 4 <input type="checkbox"/> | _____ |
| c. Need to urinate frequently _____                    | 0 <input type="checkbox"/> | 1 <input type="checkbox"/> | 2 <input type="checkbox"/> | 3 <input type="checkbox"/> | 4 <input type="checkbox"/> | _____ |

CLINICIANS: ADD the answers from questions 5a-5c to calculate the **Urinary Irritation/Obstruction Symptom Score (out of 12):**

6. How big a problem, if any, has each of the following been for you?

|                                                      | No problem                 | Very small problem         | Small problem              | Moderate problem           | Big problem                |       |
|------------------------------------------------------|----------------------------|----------------------------|----------------------------|----------------------------|----------------------------|-------|
| a. Rectal pain or urgency of bowel movements _____   | 0 <input type="checkbox"/> | 1 <input type="checkbox"/> | 2 <input type="checkbox"/> | 3 <input type="checkbox"/> | 4 <input type="checkbox"/> | _____ |
| b. Increased frequency of your bowel movements _____ | 0 <input type="checkbox"/> | 1 <input type="checkbox"/> | 2 <input type="checkbox"/> | 3 <input type="checkbox"/> | 4 <input type="checkbox"/> | _____ |
| c. Overall problems with your bowel habits _____     | 0 <input type="checkbox"/> | 1 <input type="checkbox"/> | 2 <input type="checkbox"/> | 3 <input type="checkbox"/> | 4 <input type="checkbox"/> | _____ |

CLINICIANS: ADD the answers from questions 6a-6c to calculate the **Bowel Symptom Score (out of 12):**

7. How would you rate your ability to reach orgasm (climax)?

- 0  Very good    1  Good    2  Fair    3  Poor    4  Very poor to none    \_\_\_\_\_

8. How would you describe the usual quality of your erections?

- 0  Firm enough for intercourse    1  Firm enough for masturbation and foreplay only    2  Not firm enough for any sexual activity    4  None at all    \_\_\_\_\_

9. Overall, how much of a problem has your sexual function or lack of sexual function been for you?

- 0  No problem    1  Very small problem    2  Small problem    3  Moderate problem    4  Big problem    \_\_\_\_\_

CLINICIANS: ADD the answers from questions 7-9 to calculate the **Sexual Symptom Score (out of 12):**

10. How big a problem, if any, has each of the following been for you?

|                                                       | No problem                 | Very small problem         | Small problem              | Moderate problem           | Big problem                |       |
|-------------------------------------------------------|----------------------------|----------------------------|----------------------------|----------------------------|----------------------------|-------|
| a. Hot flashes or breast tenderness/enlargement _____ | 0 <input type="checkbox"/> | 1 <input type="checkbox"/> | 2 <input type="checkbox"/> | 3 <input type="checkbox"/> | 4 <input type="checkbox"/> | _____ |
| b. Feeling depressed _____                            | 0 <input type="checkbox"/> | 1 <input type="checkbox"/> | 2 <input type="checkbox"/> | 3 <input type="checkbox"/> | 4 <input type="checkbox"/> | _____ |
| c. Lack of energy _____                               | 0 <input type="checkbox"/> | 1 <input type="checkbox"/> | 2 <input type="checkbox"/> | 3 <input type="checkbox"/> | 4 <input type="checkbox"/> | _____ |

CLINICIANS: ADD the answers from questions 10a-10c to calculate the **Vitality/Hormonal Symptom Score (out of 12):**

CLINICIANS: Add the five domain summary scores to calculate the **Overall Prostate Cancer QOL Score (out of 60):**

A downloadable version of EPIC-CP can be found at <http://www.bidmc.org/epic>
